# Supplementary material for: SUMO E3 ligase Mms21 prevents spontaneous DNA damage induced genome rearrangements
Source: PubMed Central journal article supplement (PMC5860785; doi:10.1371/journal.pgen.1007250), 2018-03-05
Supplement: pgen.1007250.s001.pdf [file pgen.1007250.s001.pdf]

# S1 Figure

## A. uGCR assay

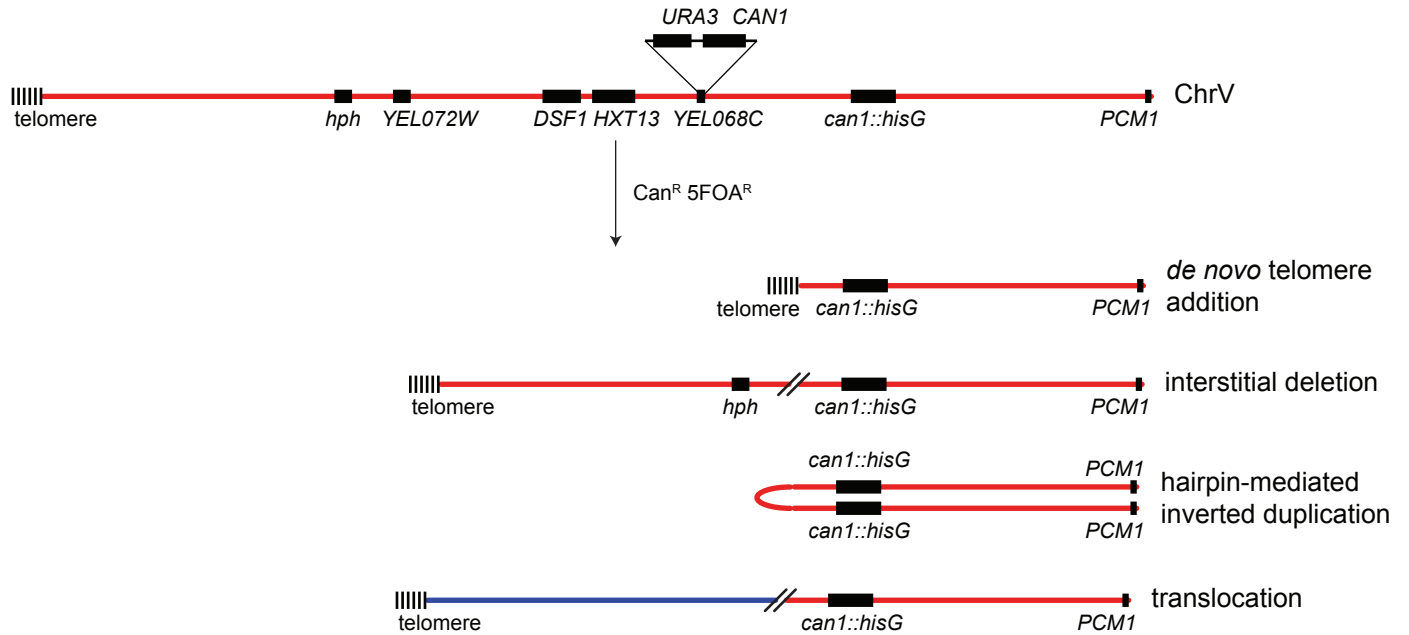

## B. dGCR assay

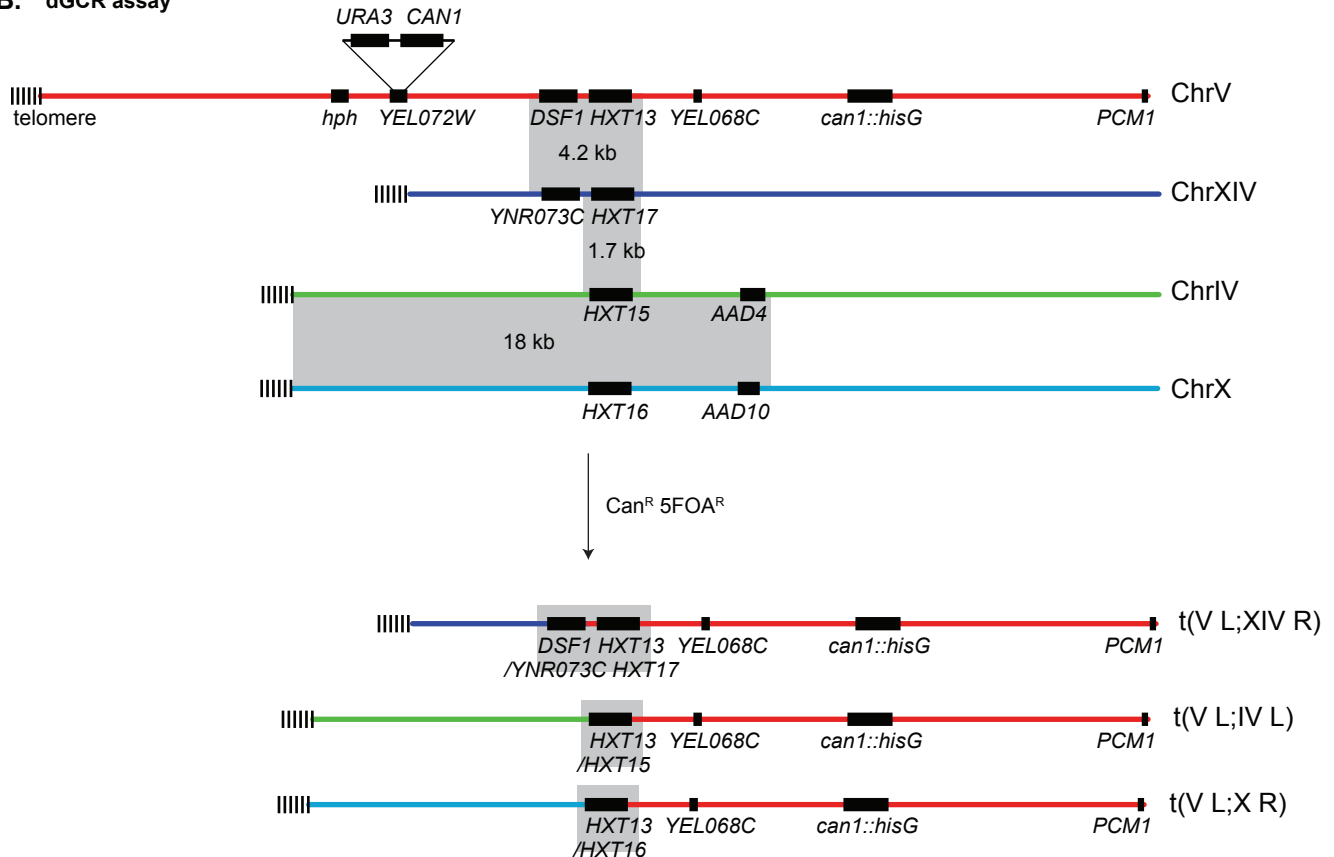

+ *de novo* telomere addition, interstitial deletions, hairpin-mediated inverted duplications, translocations
