# Supplementary material for: SUMO E3 ligase Mms21 prevents spontaneous DNA damage induced genome rearrangements
Source: PubMed Central journal article supplement (PMC5860785; doi:10.1371/journal.pgen.1007250), 2018-03-05
Supplement: pgen.1007250.s002.pdf [file pgen.1007250.s002.pdf]

S2 Figure

Genetic map showing genes and junctions on a chromosome:

- iYEL072W::hph* → *hph* (Junctions 5-A, 5-B)
- yel068c::CAN1/URA3* → *URA3* (Junctions 5-C, 5-D)
- CAN1* (Junctions 5-E, 5-F)
- can1::hisG* → *hisG* (Junctions 5-G, 5-H)
- mms21-CH.kanMX6* → *kanMX6* (Junctions 5-I, 5-J)
- P<sub>ADH1</sub>* (Junctions 5-I, 5-J)
- MMS21* (Junctions 5-I, 5-J)
- CEN5* (Centromere)
- ChrV* (Chromosome V)

|                             | Junction:          | 5-A     | 5-B      | 5-C     | 5-D     | 5-E     | 5-F      | 5-G     | 5-H     | 5-I     | 5-J     | 5-IJ   |        |
|-----------------------------|--------------------|---------|----------|---------|---------|---------|----------|---------|---------|---------|---------|--------|--------|
| wt                          | bzg001             | -/-     | -/-      | -/-     | -/-     | -/-     | -/-      | -/-     | n.a.    | n.a.    | n.a.    | n.a.   |        |
|                             | bzg002             | -/-     | -/-      | -/-     | -/-     | -/-     | 1370/513 | 932/302 | n.a.    | n.a.    | n.a.    | n.a.   |        |
| <i>mre11</i>                | bzg003             | -/-     | -/-      | -/-     | -/-     | -/-     | 545/271  | 309/153 | n.a.    | n.a.    | n.a.    | n.a.   |        |
|                             | bzg004             | 765/198 | 1144/322 | 678/430 | -/-     | -/-     | -/-      | -/-     | n.a.    | n.a.    | n.a.    | n.a.   |        |
|                             | bzg005             | -/-     | -/-      | -/-     | -/-     | -/-     | -/-      | 89/190  | n.a.    | n.a.    | n.a.    | n.a.   |        |
|                             | bzg006             | 581/145 | 1083/344 | 520/382 | -/-     | -/-     | -/-      | 985/342 | n.a.    | n.a.    | n.a.    | n.a.   |        |
|                             | bzg007             | 211/67  | 136/38   | 119/92  | -/-     | -/-     | -/-      | 118/95  | n.a.    | n.a.    | n.a.    | n.a.   |        |
|                             | bzg008             | -/-     | -/-      | -/-     | -/-     | -/-     | 229/150  | 110/100 | n.a.    | n.a.    | n.a.    | n.a.   |        |
|                             | bzg009             | -/-     | -/-      | -/-     | -/-     | -/-     | -/-      | -/-     | n.a.    | n.a.    | n.a.    | n.a.   |        |
|                             | <i>mms21-CH</i>    | bzg010  | -/-      | -/-     | -/-     | -/-     | -/-      | -/-     | -/-     | 397/60  | 264/53  | 244/88 | 66/106 |
|                             |                    | bzg011  | -/-      | -/-     | -/-     | -/-     | 530/162  | 443/218 | 211/119 | 277/58  | 252/49  | 197/76 | 60/85  |
| bzg012                      |                    | -/-     | -/-      | -/-     | -/-     | 307/108 | 241/134  | 96/57   | 129/42  | 127/35  | 108/47  | 31/55  |        |
| <i>mms21-CH mre11</i>       | bzg013             | 444/81  | 551/83   | 355/164 | -/-     | -/-     | -/-      | -/-     | 343/50  | 327/50  | 141/58  | 22/77  |        |
|                             | bzg014             | 373/82  | 396/77   | 267/142 | -/-     | -/-     | 666/320  | 346/203 | 556/84  | 468/77  | 280/106 | 51/109 |        |
|                             | bzg015             | -/-     | -/-      | -/-     | -/-     | -/-     | 688/310  | 346/203 | 275/47  | 219/53  | 143/64  | 16/13  |        |
|                             | bzg016             | -/-     | -/-      | -/-     | -/-     | -/-     | -/-      | 454/247 | 340/62  | 314/61  | 159/66  | 22/30  |        |
|                             | bzg017             | -/-     | -/-      | -/-     | -/-     | -/-     | 219/48   | 595/260 | 833/131 | 691/116 | 379/25  | 40/77  |        |
|                             | bzg018             | -/-     | -/-      | -/-     | -/-     | -/-     | -/-      | 31/125  | 295/57  | 278/58  | 123/62  | 14/64  |        |
|                             | bzg019             | -/-     | -/-      | -/-     | -/-     | -/-     | -/-      | 12/70   | 226/31  | 148/35  | 115/40  | 10/61  |        |
|                             | bzg020             | -/-     | -/-      | -/-     | -/-     | -/-     | 830/376  | 413/222 | 403/61  | 324/59  | 168/88  | 20/62  |        |
|                             | bzg021             | -/-     | -/-      | -/-     | -/-     | -/-     | 483/271  | 300/205 | 281/33  | 169/46  | 161/62  | 16/59  |        |
|                             | bzg022             | -/-     | -/-      | -/-     | -/-     | -/-     | 648/325  | 369/188 | 234/55  | 202/62  | 129/59  | 20/52  |        |
| <i>mms21-CH mre11-H125N</i> | bzg030             | -/-     | -/-      | -/-     | -/-     | -/-     | 412/274  | 306/175 | 411/84  | 393/107 | 184/80  | 20/62  |        |
|                             | bzg031             | -/-     | -/-      | -/-     | -/-     | 477/170 | 405/247  | 330/189 | 422/100 | 397/94  | 221/80  | 18/51  |        |
|                             | bzg032             | -/-     | -/-      | -/-     | -/-     | -/-     | 498/251  | 270/143 | 333/58  | 403/79  | 191/51  | 30/45  |        |
|                             | bzg033             | -/-     | -/-      | -/-     | -/-     | -/-     | -/-      | 46/111  | 302/44  | 301/68  | 168/73  | 27/48  |        |
|                             | bzg034             | -/-     | -/-      | -/-     | -/-     | -/-     | 812/349  | 624/222 | 395/57  | 339/70  | 144/74  | 16/50  |        |
|                             | bzg035             | -/-     | -/-      | -/-     | -/-     | 922/224 | 789/380  | 512/239 | 375/73  | 348/84  | 180/71  | 30/66  |        |
|                             | bzg036             | -/-     | -/-      | -/-     | -/-     | -/-     | 330/246  | 227/130 | 303/55  | 258/70  | 121/49  | 21/35  |        |
|                             | bzg037             | -/-     | -/-      | -/-     | -/-     | -/-     | -/-      | -/-     | 368/72  | 363/94  | 171/77  | 50/68  |        |
|                             | bzg038             | -/-     | -/-      | -/-     | -/-     | -/-     | 345/212  | 249/123 | 222/49  | 253/72  | 126/64  | 11/52  |        |
|                             | bzg039             | -/-     | -/-      | -/-     | -/-     | 530/192 | 488/300  | 307/162 | 335/62  | 351/105 | 155/64  | 29/60  |        |
|                             | bzg040             | -/-     | -/-      | -/-     | -/-     | -/-     | 603/282  | 990/460 | 353/69  | 372/106 | 163/76  | 21/62  |        |
|                             | bzg041             | -/-     | -/-      | -/-     | -/-     | -/-     | -/-      | 60/181  | 887/171 | 651/195 | 377/149 | 83/220 |        |
|                             | <i>mre11-H125N</i> | bzg042  | -/-      | -/-     | -/-     | -/-     | -/-      | -/-     | -/-     | n.a.    | n.a.    | n.a.   | n.a.   |
|                             |                    | bzg043  | 630/109  | 745/142 | 530/224 | -/-     | -/-      | -/-     | 68/145  | n.a.    | n.a.    | n.a.   | n.a.   |
|                             |                    | bzg044  | 732/125  | 722/122 | 584/218 | -/-     | -/-      | -/-     | 57/159  | n.a.    | n.a.    | n.a.   | n.a.   |
| bzg045                      |                    | 609/108 | 713/137  | 522/188 | -/-     | -/-     | -/-      | 64/159  | n.a.    | n.a.    | n.a.    | n.a.   |        |
| bzg046                      |                    | -/-     | -/-      | -/-     | -/-     | -/-     | -/-      | 50/129  | n.a.    | n.a.    | n.a.    | n.a.   |        |
| bzg047                      |                    | -/-     | -/-      | -/-     | -/-     | -/-     | 863/349  | 584/232 | n.a.    | n.a.    | n.a.    | n.a.   |        |
