# Supplementary material for: SUMO E3 ligase Mms21 prevents spontaneous DNA damage induced genome rearrangements
Source: PubMed Central journal article supplement (PMC5860785; doi:10.1371/journal.pgen.1007250), 2018-03-05
Supplement: pgen.1007250.s003.pdf [file pgen.1007250.s003.pdf]

S3 Figure

|                             | Junction:          | 3-A      | 3-B     | 4-A     | 13-A    | 13-B    | 13-C    | 13-D    | 15-A    | 15-B    | 15-C    |         |
|-----------------------------|--------------------|----------|---------|---------|---------|---------|---------|---------|---------|---------|---------|---------|
| wt                          | bzg001             | 1118/215 | 275/11  | 808/183 | n.a.    | n.a.    | n.a.    | n.a.    | 905/116 | 773/124 | 777/135 |         |
|                             | bzg002             | 1081/234 | 234/11  | 718/165 | n.a.    | n.a.    | n.a.    | n.a.    | 781/118 | 646/116 | 680/158 |         |
| <i>mre11</i>                | bzg003             | 510/110  | 90/2    | 418/81  | n.a.    | n.a.    | 258/81  | 275/61  | 525/105 | 346/71  | 322/67  |         |
|                             | bzg004             | 847/215  | 110/3   | 685/185 | n.a.    | n.a.    | 475/145 | 461/103 | 864/169 | 691/131 | 630/155 |         |
|                             | bzg005             | 676/187  | 88/4    | 603/168 | n.a.    | n.a.    | 328/134 | 418/126 | 646/143 | 589/109 | 523/132 |         |
|                             | bzg006             | 640/166  | 55/?    | 535/182 | n.a.    | n.a.    | 315/139 | 293/61  | 655/140 | 530/181 | 518/97  |         |
|                             | bzg007             | 166/35   | 68/2    | 242/55  | n.a.    | n.a.    | 142/36  | 351/76  | 204/45  | 148/26  | 132/31  |         |
|                             | bzg008             | 322/76   | 95/2    | 378/100 | n.a.    | n.a.    | 241/65  | 464/107 | 316/70  | 302/77  | 218/49  |         |
|                             | bzg009             | 473/76   | 144/6   | 481/121 | n.a.    | n.a.    | 311/74  | 520/113 | 372/45  | 376/62  | 386/72  |         |
|                             | <i>mms21-CH</i>    | bzg010   | 489/77  | 190/6   | 511/105 | n.a.    | n.a.    | n.a.    | n.a.    | 364/73  | 425/90  | 398/58  |
|                             |                    | bzg011   | 422/69  | 155/5   | 386/81  | n.a.    | n.a.    | n.a.    | n.a.    | 360/68  | 344/57  | 289/63  |
| bzg012                      |                    | 241/39   | 79/2    | 184/34  | n.a.    | n.a.    | n.a.    | n.a.    | 196/56  | 163/34  | 118/35  |         |
| <i>mms21-CH mre11</i>       | bzg013             | 457/72   | 82/2    | 386/70  | n.a.    | n.a.    | 293/129 | 436/80  | 315/86  | 322/84  | 323/78  |         |
|                             | bzg014             | 353/64   | 7/4     | 310/66  | n.a.    | n.a.    | 250/96  | 302/146 | 269/63  | 276/100 | 250/41  |         |
|                             | bzg015             | 346/76   | 75/0    | 322/16  | n.a.    | n.a.    | 226/114 | 335/141 | 250/69  | 236/53  | 225/54  |         |
|                             | bzg016             | 449/77   | 56/3    | 363/96  | n.a.    | n.a.    | 277/141 | 404/173 | 307/83  | 289/161 | 306/60  |         |
|                             | bzg017             | 550/95   | 81/2    | 451/111 | n.a.    | n.a.    | 374/163 | 417/210 | 382/98  | 372/72  | 384/63  |         |
|                             | bzg018             | 384/85   | 56/5    | 330/65  | n.a.    | n.a.    | 246/111 | 398/174 | 297/80  | 272/68  | 270/43  |         |
|                             | bzg019             | 255/51   | 3/0     | 211/52  | n.a.    | n.a.    | 144/93  | 214/130 | 198/44  | 145/44  | 152/50  |         |
|                             | bzg020             | 471/93   | 81/12   | 445/61  | n.a.    | n.a.    | 296/132 | 405/195 | 327/90  | 337/88  | 306/81  |         |
|                             | bzg021             | 236/65   | 54/0    | 265/60  | n.a.    | n.a.    | 162/125 | 212/112 | 267/61  | 260/58  | 237/51  |         |
|                             | bzg022             | 346/55   | 69/3    | 286/69  | n.a.    | n.a.    | 205/92  | 299/153 | 235/63  | 222/53  | 223/56  |         |
| <i>mms21-CH mre11-H125N</i> | bzg030             | 488/94   | n.a.    | 414/97  | 115/321 | 282/148 | n.a.    | n.a.    | 340/84  | 368/71  | 382/90  |         |
|                             | bzg031             | 504/101  | n.a.    | 450/86  | 176/326 | 272/143 | n.a.    | n.a.    | 410/93  | 395/78  | 384/93  |         |
|                             | bzg032             | 500/85   | n.a.    | 338/93  | 160/286 | 247/143 | n.a.    | n.a.    | 395/83  | 349/63  | 308/74  |         |
|                             | bzg033             | 447/55   | n.a.    | 382/74  | 163/291 | 256/100 | n.a.    | n.a.    | 294/82  | 331/97  | 277/47  |         |
|                             | bzg034             | 474/71   | n.a.    | 401/88  | 161/312 | 262/137 | n.a.    | n.a.    | 358/74  | 398/64  | 385/80  |         |
|                             | bzg035             | 481/96   | n.a.    | 381/83  | 174/332 | 233/130 | n.a.    | n.a.    | 363/71  | 333/68  | 304/69  |         |
|                             | bzg036             | 375/78   | n.a.    | 290/64  | 114/256 | 200/105 | n.a.    | n.a.    | 253/62  | 243/67  | 271/46  |         |
|                             | bzg037             | 549/85   | n.a.    | 452/97  | 209/365 | 339/155 | n.a.    | n.a.    | 397/100 | 488/98  | 371/72  |         |
|                             | bzg038             | 399/72   | n.a.    | 244/58  | 105/222 | 185/115 | n.a.    | n.a.    | 249/68  | 244/61  | 252/62  |         |
|                             | bzg039             | 520/97   | n.a.    | 373/72  | 143/312 | 231/134 | n.a.    | n.a.    | 305/68  | 298/85  | 320/77  |         |
|                             | bzg040             | 483/91   | n.a.    | 369/66  | 152/285 | 226/137 | n.a.    | n.a.    | 349/74  | 353/71  | 291/72  |         |
|                             | bzg041             | 601/140  | n.a.    | 483/140 | 194/432 | 431/190 | n.a.    | n.a.    | 450/114 | 492/125 | 467/115 |         |
|                             | <i>mre11-H125N</i> | bzg042   | 393/81  | 63/2    | 246/62  | 94/189  | 175/112 | n.a.    | n.a.    | 239/72  | 199/58  | 192/44  |
|                             |                    | bzg043   | 577/88  | 125/0   | 444/71  | 204/332 | 320/153 | n.a.    | n.a.    | 332/93  | 431/105 | 393/69  |
|                             |                    | bzg044   | 664/111 | 198/3   | 583/19  | 281/348 | 392/176 | n.a.    | n.a.    | 474/97  | 584/122 | 594/101 |
| bzg045                      |                    | 597/110  | 162/3   | 393/73  | 233/316 | 339/137 | n.a.    | n.a.    | 348/67  | 385/64  | 326/63  |         |
| bzg046                      |                    | 644/104  | 173/7   | 412/79  | 241/312 | 404/144 | n.a.    | n.a.    | 450/83  | 434/72  | 434/62  |         |
| bzg047                      |                    | 615/93   | 111/9   | 349/73  | 178/279 | 276/143 | n.a.    | n.a.    | 294/70  | 306/46  | 311/61  |         |
