# Supplementary material for: SUMO E3 ligase Mms21 prevents spontaneous DNA damage induced genome rearrangements
Source: PubMed Central journal article supplement (PMC5860785; doi:10.1371/journal.pgen.1007250), 2018-03-05

Microhomology/non-homology translocation

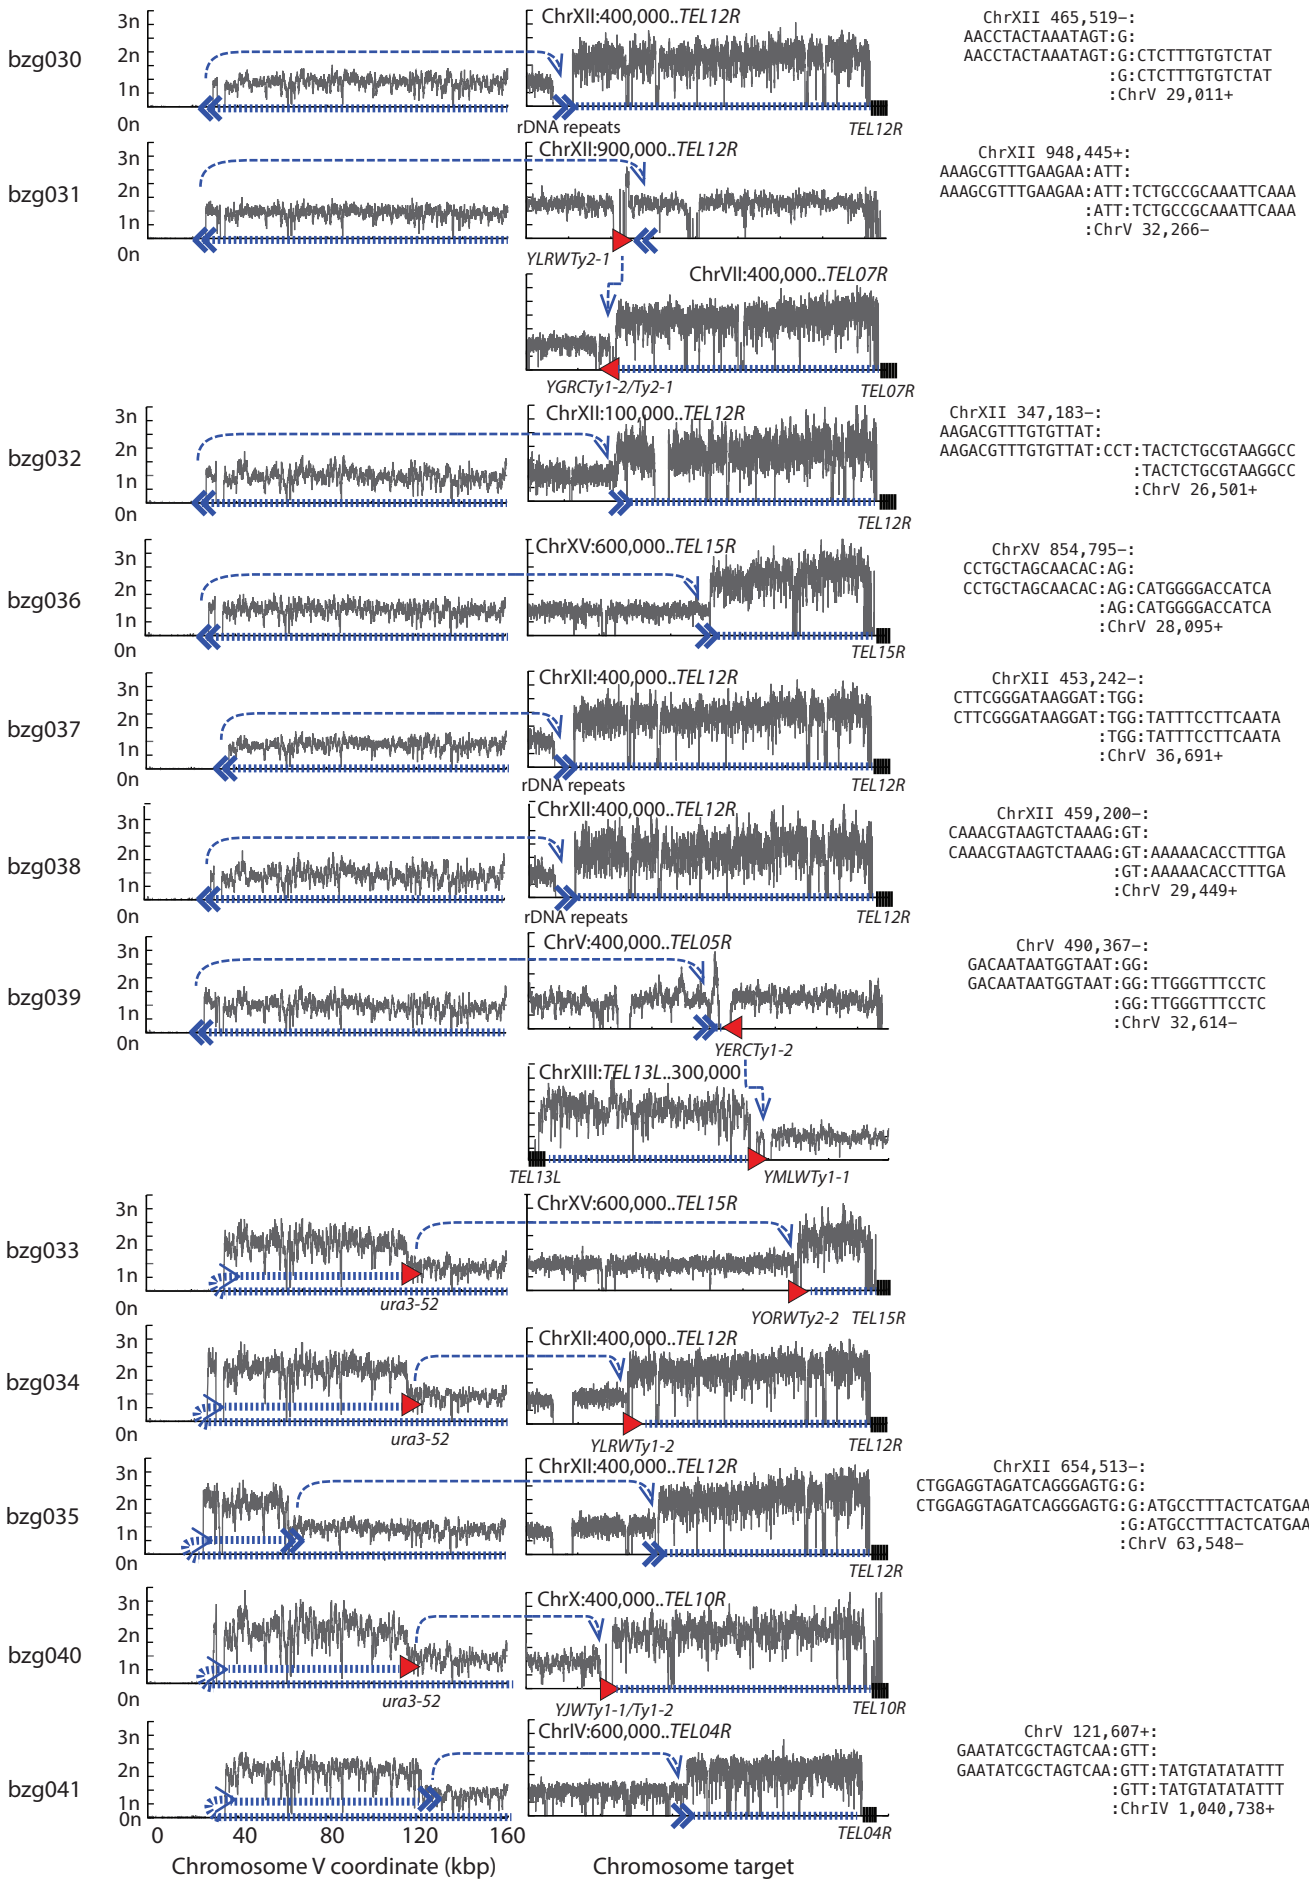

Supplement: pgen.1007250.s009.pdf [file pgen.1007250.s009.pdf]
