# Supplementary material for: SUMO E3 ligase Mms21 prevents spontaneous DNA damage induced genome rearrangements
Source: PubMed Central journal article supplement (PMC5860785; doi:10.1371/journal.pgen.1007250), 2018-03-05
Supplement: pgen.1007250.s012.pdf [file pgen.1007250.s012.pdf]

S12 Figure

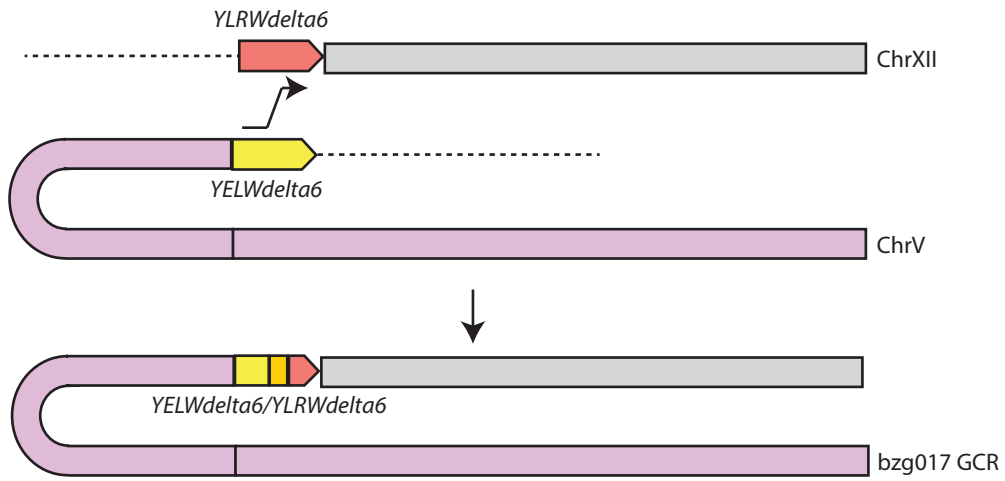

|               |                                                               |
|---------------|---------------------------------------------------------------|
| ChrV 137949   | ATGATGATTCATTATTGCGAATAAAGGTATTTCTGAAAGTACATCTAATGGGCTATTTG   |
| Junction      | ATGATGATTCATTATTGCGAATAAAGGTATTTCTGAAAGTACATCTAATGGGCTATTTG   |
| ChrV 138009   | AAAATTTGTTTAGGATTATGGTAATAAAAGAGGCATTAACGCCAGAACCTTTATTTTATC  |
| Junction      | AAAATTTGTTTAGGATTATGGTAATAAAAGAGGCATTAACGCCAGAACCTTTATTTTATC  |
| ChrV 138069   | ACTTTTTCGATATTTGTTAATAATCTAAATCTAACTTATATCTAAACCTTAGCGTTTGCA  |
| Junction      | ACTTTTTCGATATTTGTTAATAATCTAAATCTAACTTATATCTAAACCTTAGCGTTTGCA  |
| ChrV 138129   | TTCTTGATTCTATATTTTTATTACAATATGAAAGGAAAAACAATCTCTTAGGTTGTC     |
| Junction      | TTCTTGATTCTATATTTTTATTACAATATGAAAGGAAAAACAATCTCTTAGGTTGTC     |
| ChrV 138189   | CAAGAAAACCTTCTCCTGTCATACTCAAAGTGGTTGGAACAAAAATCAACTATCGTCTA   |
| Junction      | CAAGAAAACCTTCTCCTGTCATACTCAAAGTGGTTGGAACAAAAATCAACTATCGTCTA   |
| ChrV 138249   | TCAACTAGTAGCTATACTACTAATATATTATCATATACGGTGTAGATGATGACATAAGT   |
| Junction      | TCAACTAGTAGCTATACTACTAATATATTATCATATACGGTGTAGATGATGACATAAGT   |
| ChrV 138309   | TATGAGAAGCTGTCATCGAAGTTAGAAGAAGCTGAAATGCAAGGATTGATAATGTAATAG  |
| Junction      | TATGAGAAGCTGTCATCGAAGTTAGAAGAAGCTGAAATGCAAGGATTGATAATGTAATAG  |
| ChrXII 448948 | GAAGCTGAAATGCAAGGATTGATAGTGAATAG                              |
| ChrV 138369   | A: AT: TTAATGAAACATATAAAACG                                   |
| Junction      | A: AT: --AATGAAACATATAAAACGAAAAGAGAAATAATCATAACATTATTTCTAGAGT |
| ChrXII 448981 | G: AT: --AATGAAACATATAAAACGAAAAGAGAAATAATCATAACATTATTTCTAGAGT |
| Junction      | AGCGATTCCCCTTCGCGTATTCTTACATCTTCGAAGAGAACTTCTGGTGTAAGTATAATA  |
| ChrXII 449037 | AGCGATTCCCCTTCGCGTATTCTTACATCTTCGAAGAGAACTTCTGGTGTAAGTATAATA  |
| Junction      | AATATTATAGCTCTATCGAATGGTGAATTATTTACCAAATCTCAATAGGAATCCATAA    |
| ChrXII 449097 | AATATTATAGCTCTATCGAATGGTGAATTATTTACCAAATCTCAATAGGAATCCATAA    |
| Junction      | TACTACATACGATACTAATATTCTAGTATTTTTATACTTATTATTTCTTTTTTATTACAC  |
| ChrXII 449157 | TACTACATACGATACTAATATTCTAGTATTTTTATACTTATTATTTCTTTTTTATTACAC  |
