# Supplementary material for: SUMO E3 ligase Mms21 prevents spontaneous DNA damage induced genome rearrangements
Source: PubMed Central journal article supplement (PMC5860785; doi:10.1371/journal.pgen.1007250), 2018-03-05
Supplement: pgen.1007250.s013.pdf [file pgen.1007250.s013.pdf]

S13 Figure

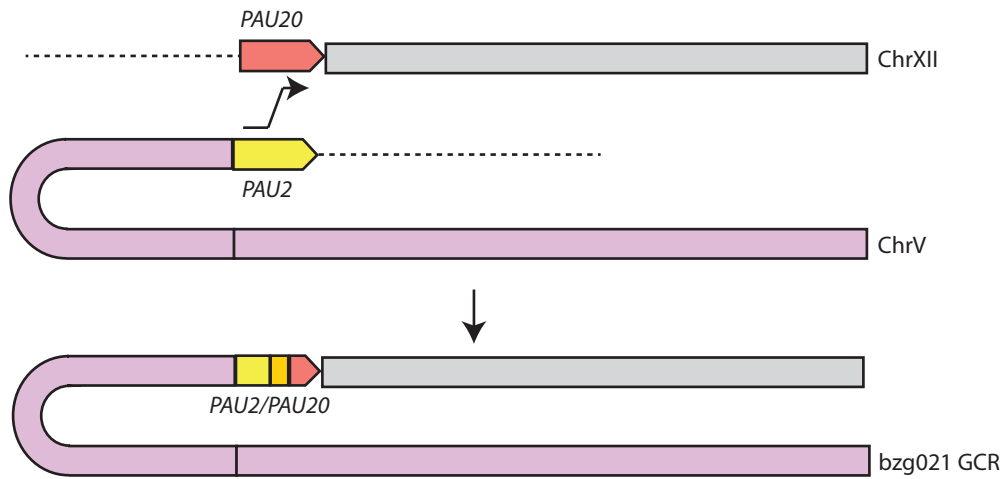

|             |                                                                  |
|-------------|------------------------------------------------------------------|
| ChrV 63591  | GTGGCCCTCGTTCATGTAAGAGAAGCTGGCCGAGAAATTCATATAAATTGAACTGCTTT      |
| Junction    | GTGGCCCTCGTTCATGTAAGAGAAGCTGGCCGAGAAATTCATATAAATTGAACTGCTTT      |
| ChrV 63651  | GGTTACCTCTCTTTGGTATATGCCTCCACTCTTCTCTTCTAGTTAAGCTTATATCAGCA      |
| Junction    | GGTTACCTCTCTTTGGTATATGCCTCCACTCTTCTCTTCTAGTTAAGCTTATATCAGCA      |
| ChrV 63711  | CAAACAAAACAAATAAAATGGTCAAATTAACCTCAATTGCCGCTGGTGTGCGCCATCG       |
| Junction    | CAAACAAAACAAATAAAATGGTCAAATTAACCTCAATTGCCGCTGGTGTGCGCCATCG       |
| ChrXV 11927 | AAACAAAACAAATATAATGGTCAAATTAACCTCAATCGCTGCTGGTGTGCGCCATCG        |
| ChrV 63771  | CTGCTAC: TGCTTCCGCAACCACCCTAGCTCAATCTGACGAAAGAGTCAACTTGGT: T: G  |
| Junction    | CTGCTAC: TGCTTCCGCAACCACCCTAGCTCAATCTGACGAAAGAGTCAACTTGGT: G: G  |
| ChrXV 11868 | CTGCTGG: TGCTTCCGCAACCACCCTAGCTCAATCTGACGAAAGAGTCAACTTGGT: G: G  |
| ChrV 63831  | AATTGGGTGTCTACGT: ATCTGATATCAGAGCTCATTTGGCTCAATACTACTCTTTCCAAG   |
| Junction    | AATTGGGTGTCTACGT: ATCTGATATCAGAGCTCATTTGGCTCAATACTACTCTTTCCAAG   |
| ChrXV 11808 | AATTGGGTGTCTACGT: CTCTGATATCAGAGCTCACTTGGCCCAATACTACATGTTCCAAG   |
| ChrV 63891  | CTGCTCACCCAAGTAAACCTACCCAA: T: TGAAGTTGCTGAG: GCCGTTTTCAACTACGGT |
| Junction    | CTGCTCACCCAAGTAAACCTACCCAA: T: CGAAGTTGCTGAA: GCCGTTTTCAACTACGGT |
| ChrXV 11748 | CCGCCACCCAAGTAAACCTACCCAG: T: CGAAGTTGCTGAA: GCCGTTTTCAACTACGGT  |
| ChrV 63951  | ACTTACCACCATGTTGACTGGTATT: GCCCAGACCAAGTG: ACCAGAATGATCACCAGTG   |
| Junction    | ACTTACCACCATGTTGACTGGTATT: GCCCAGACCAAGTG: ACCAGAATGATCACCAGTG   |
| ChrXV 11688 | ACTTACCACCATGTTGACTGGTATT: TCCCAGACCAAGTC: ACCAGAATGATCACCAGTG   |
| ChrV 64011  | T: TCCATGGTACTCCAGCAGATTAAGCCAGCCATTTCCAGTGCTCTATCCAAGGACGGTA    |
| Junction    | T: CCCATGGTACTCCAGCAGATTAAGCCAGCTATCTCCAAGGCTCTATCCAAGATGGTA     |
| ChrXV 11628 | T: CCCATGGTACTCCAGCAGATTAAGCCAGCTATCTCCAAGGCTCTATCCAAGATGGTA     |
| Junction    | TCTACACTATCGCAAAGTAGAGACTGATGCCTTTACGAATGAAAATCCATAGACAGTGAA     |
| ChrXV 11568 | TCTACACTATCGCAAAGTAGAGACTGATGCCTTTACGAATGAAAATCCATAGACAGTGAA     |
| Junction    | AAGTAATGAAAAATAAAATAAAAACTACTTTTTTTGATGATATAAAATACCGTTGATTAT     |
| ChrXV 11508 | AAGTAATGAAAAATAAAATAAAAACTACTTTTTTTGATGATATAAAATACCGTTGATTAT     |
