# Supplementary material for: SUMO E3 ligase Mms21 prevents spontaneous DNA damage induced genome rearrangements
Source: PubMed Central journal article supplement (PMC5860785; doi:10.1371/journal.pgen.1007250), 2018-03-05
Supplement: pgen.1007250.s014.pdf [file pgen.1007250.s014.pdf]

S14 Figure

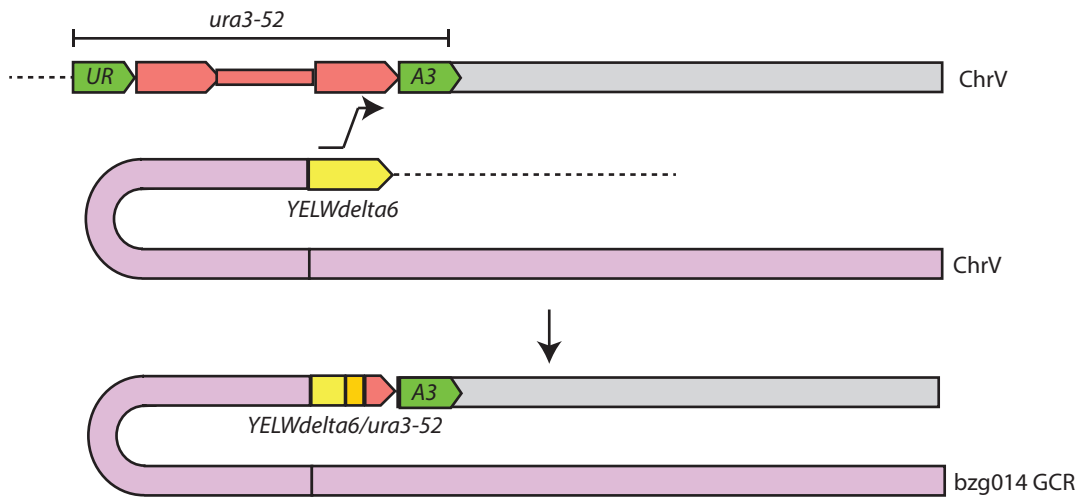

|             |                                                                |
|-------------|----------------------------------------------------------------|
| chrV 138350 | AGGATTGATAATGTAATAGAATTTAATGAAACATATAAAACGGAATGAGGAATAATCGTA   |
| bzg014      | AGGATTGATAATGTAATAGAATTTAATGAAACATATAAAACGGAATGAGGAATAATCGTA   |
| chrV 138410 | ATATTAGTATGTAAAAATATGGATTCCATTTTGAGGATTCCTATATCCATGAGGAGA      |
| bzg014      | ATATTAGTATGTAAAAATATGGATTCCATTTTGAGGATTCCTATATCCATGAGGAGA      |
| ura3-52     | ATAGAATTGTGTAGAATTGCAGATTCCTTTTATGGATTCCTAAATCCTTGAGGAGA       |
| chrV 138470 | TCTAGTATATGCTGTATACATAACTATAGCCTTG: ATCAACAATGGAACCCCAACAATT   |
| bzg014      | TCTAGTATATGCTGTATACATAACTATAGCCTTG: ATCAACAATGGAACCCCAACAATT   |
| ura3-52     | TCTAGTATATTCTGTATACCTAATATTATAGCCTTT: ATCAACAATGGAATCCCAACAATT |
| chrV 138530 | ATCTCA: CAATTCACCCATTTCTCA:                                    |
| bzg014      | ATCTCA: ACATTCACATATTTCTCA: GTACCACCAAG                        |
| ura3-52     | ATCTCA: ACATTCACATATTTCTCA: GTACCACCAAG                        |
| bzg014      | GAATTACTGGAGTTAGTTGAAGCATTAGGTCCCAAATTTGTTTACTAAAAACACATGTG    |
| chrV 116293 | GAATTACTGGAGTTAGTTGAAGCATTAGGTCCCAAATTTGTTTACTAAAAACACATGTG    |
| bzg014      | GATATCTTGACTGATTTTTCCATGGAGGGCACAGTTAAGCCGCTAAAGGCATTATCCGCC   |
| chrV 116353 | GATATCTTGACTGATTTTTCCATGGAGGGCACAGTTAAGCCGCTAAAGGCATTATCCGCC   |
| bzg014      | AAGTACAATTTTTACTCTTCGAAGACAGAAAATTTGCTGACATTGGTAATACAGTCAAA    |
| chrV 116413 | AAGTACAATTTTTACTCTTCGAAGACAGAAAATTTGCTGACATTGGTAATACAGTCAAA    |
