# Supplementary material for: SUMO E3 ligase Mms21 prevents spontaneous DNA damage induced genome rearrangements
Source: PubMed Central journal article supplement (PMC5860785; doi:10.1371/journal.pgen.1007250), 2018-03-05
Supplement: pgen.1007250.s015.pdf [file pgen.1007250.s015.pdf]

S15 Figure

A.

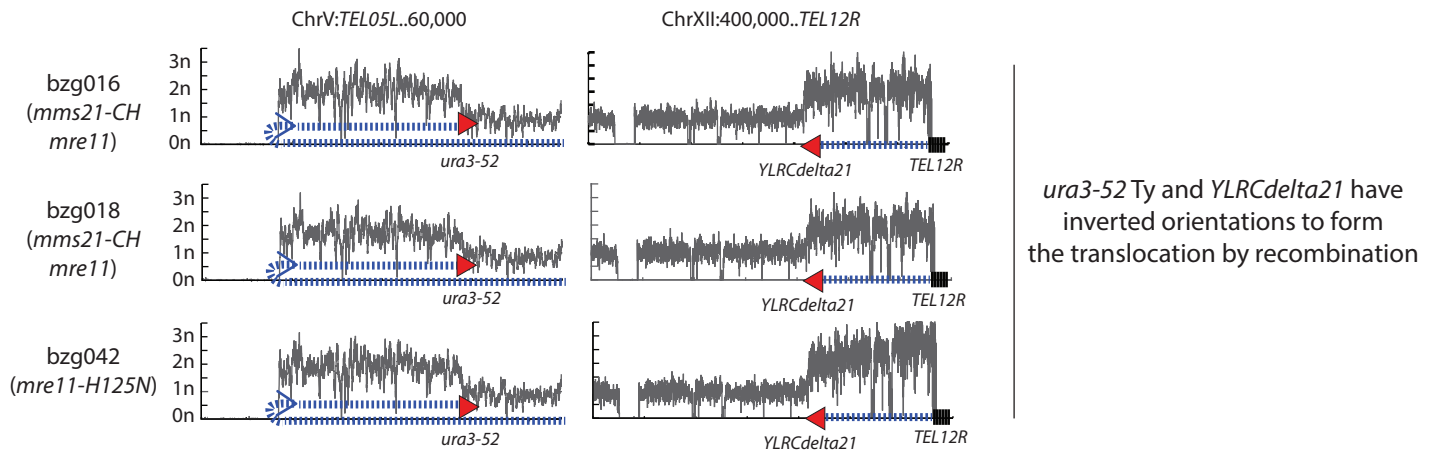

B.

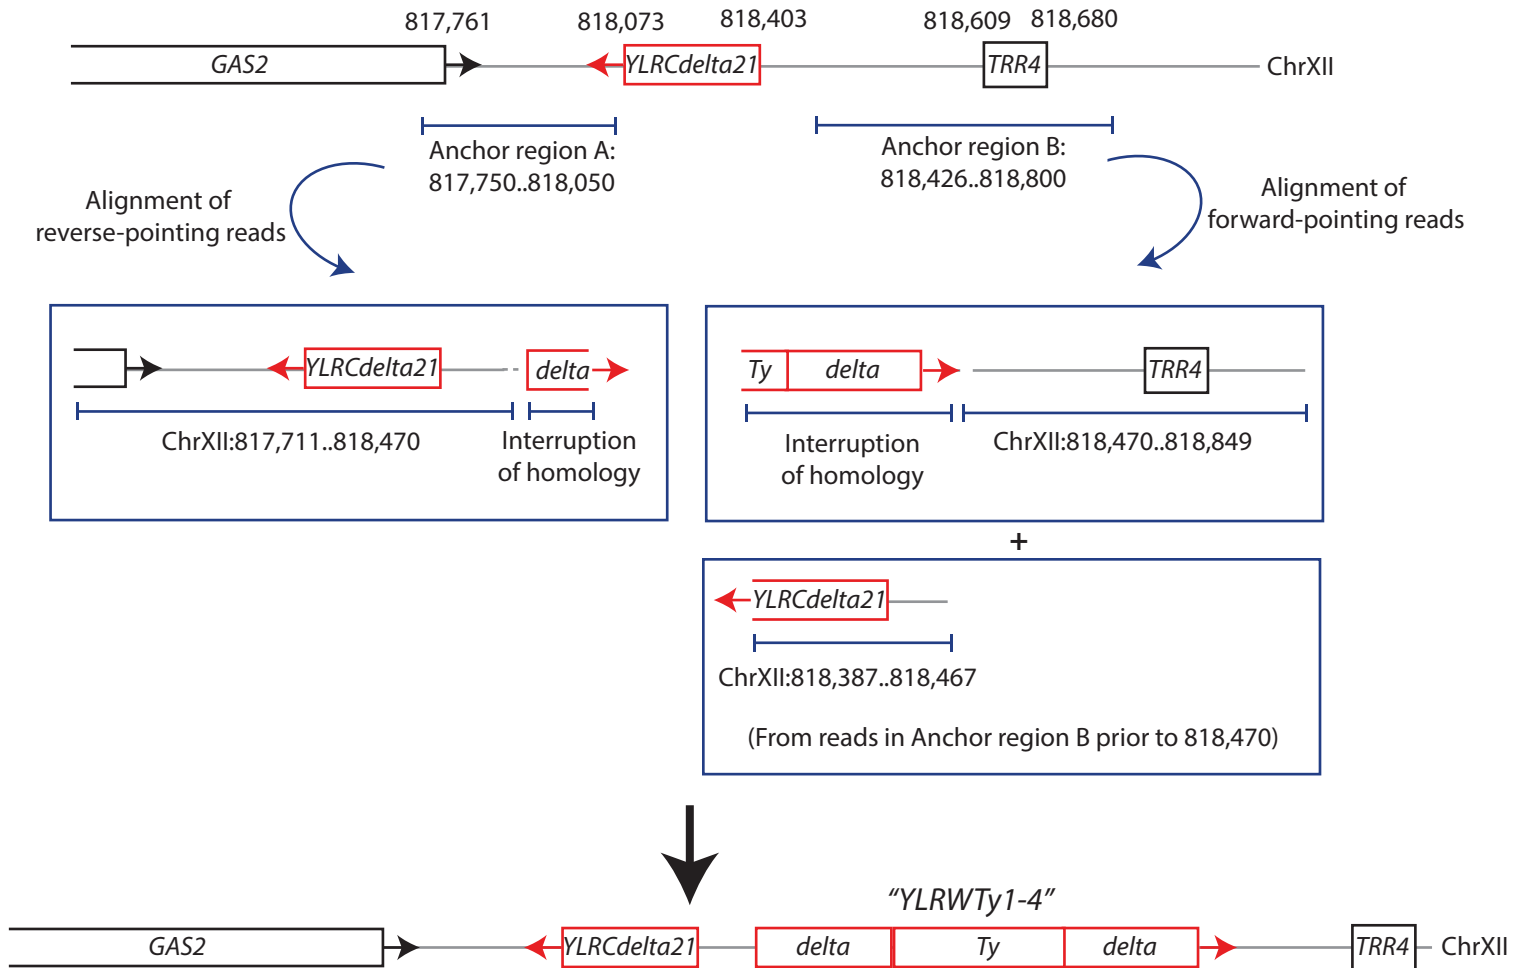

C.

TTTAAACTTGATTAATACTTTTTTTT : TGTTGGAATAAAAATCCACTATCG . . . ACAATTATCTCAACATTCACATATTTCTCA : TTTTATACCTTTAACTATCATCATCAAT  
 TTTAAACTTGATTAATACTTTTTTTT : TTTTATACCTTTAACTATCATCATCAAT  
 ChrXII 818,474+ : ChrXII 818,470+
