# Supplementary material for: SUMO E3 ligase Mms21 prevents spontaneous DNA damage induced genome rearrangements
Source: PubMed Central journal article supplement (PMC5860785; doi:10.1371/journal.pgen.1007250), 2018-03-05
Supplement: pgen.1007250.s018.pdf [file pgen.1007250.s018.pdf]

S1 Table. Fluctuation results of double mutants containing a null mutation of genes in the Rad52 pathway and *mms21-CH*.

| Genotype               | uGCR rate*                                                                                                | dGCR rate*                                                                                                | Ratio # |
|------------------------|-----------------------------------------------------------------------------------------------------------|-----------------------------------------------------------------------------------------------------------|---------|
| Wild type**            | 2.27x10 <sup>-9</sup> (1)<br>[1.30x10 <sup>-9</sup> – 4.78x10 <sup>-9</sup> ]                             | 1.97x10 <sup>-8</sup> (8.7)<br>[1.61x10 <sup>-8</sup> – 4.32x10 <sup>-8</sup> ]                           | 8.7     |
| <i>mms21-CH</i> **     | 2.08x10 <sup>-8</sup> (9.1)<br>[0.00x10 <sup>-8</sup> – 18.2x10 <sup>-8</sup> ]                           | 4.2x10 <sup>-6</sup> (1850)<br>[2.4x10 <sup>-6</sup> – 22.2x10 <sup>-6</sup> ]                            | 202     |
| <i>rad52Δ</i> **       | 1.67x10 <sup>-8</sup> (7.4)<br>[0.99x10 <sup>-8</sup> – 2.74x10 <sup>-8</sup> ]                           | 1.09x10 <sup>-8</sup> (4.8)<br>[0.29x10 <sup>-8</sup> – 7.08x10 <sup>-8</sup> ]                           | 0.7     |
| <i>rad52Δ mms21-CH</i> | 1.66x10 <sup>-7</sup> (73)<br>[2.62x10 <sup>-8</sup> – 5.64x10 <sup>-7</sup> ]<br>{HZY3310/3311}          | 1.20x10 <sup>-7</sup> (53)<br>[4.98x10 <sup>-8</sup> – 3.84x10 <sup>-7</sup> ]<br>{HZY3019/3020}          | 0.7     |
| <i>rad59Δ</i> **       | 5.85x10 <sup>-9</sup> (2.6)<br>[0.57x10 <sup>-9</sup> – 24.7x10 <sup>-9</sup> ]                           | 6.94x10 <sup>-8</sup> (31)<br>[5.17x10 <sup>-8</sup> – 9.12x10 <sup>-8</sup> ]                            | 12      |
| <i>rad59Δ mms21-CH</i> | 3.66x10 <sup>-7</sup> (161)<br>[1.56x10 <sup>-7</sup> – 8.82 x10 <sup>-7</sup> ]<br>{HZY3362/3363}        | 2.71x10 <sup>-6</sup> (1194)<br>[1.16x10 <sup>-6</sup> – 7.30x10 <sup>-6</sup> ]<br>{HZY3166/3167}        | 7.4     |
| <i>rad51Δ</i>          | 6.19x10 <sup>-9</sup> (2.7)<br>[2.17x10 <sup>-9</sup> – 2.99x10 <sup>-8</sup> ]<br>{HZY3264}              | 2.31x10 <sup>-8</sup> (10)**<br>[1.20x10 <sup>-8</sup> – 4.35x10 <sup>-8</sup> ]                          | 3.7     |
| <i>rad51Δ mms21-CH</i> | 2.17x10 <sup>-8</sup> (9.6)<br>[4.06x10 <sup>-9</sup> – 4.90x10 <sup>-8</sup> ]<br>{HZY3265/3266}         | 1.91 x10 <sup>-7</sup> (84)<br>[1.02x10 <sup>-7</sup> – 5.00x10 <sup>-7</sup> ]<br>{HZY3257/3258,JLY380}  | 8.8     |
| <i>rad55Δ</i>          | 5.62x10 <sup>-8</sup> (25)<br>[4.02x10 <sup>-8</sup> – 6.46x10 <sup>-8</sup> ]<br>{HZY3369}               | 2.95x10 <sup>-8</sup> (13)<br>[4.28x10 <sup>-9</sup> – 2.29x10 <sup>-7</sup> ]<br>{HZY3021/3368}          | 0.5     |
| <i>rad55Δ mms21-CH</i> | 2.23x10 <sup>-8</sup> (9.8)<br>[1.15x10 <sup>-8</sup> – 7.86x10 <sup>-8</sup> ]<br>{HZY3245/3246}         | 1.41x10 <sup>-7</sup> (62)<br>[6.74x10 <sup>-8</sup> – 2.23x10 <sup>-7</sup> ]<br>{HZY3025/3026}          | 6.3     |
| <i>rad54Δ</i>          | 1.4 x 10 <sup>-8</sup> (6.2)<br>[4.17x10 <sup>-9</sup> – 1.74x10 <sup>-8</sup> ]<br>{HZY3269/3270,JLY406} | 2.16x10 <sup>-8</sup> (9.5)<br>[1.11x10 <sup>-8</sup> – 1.03x10 <sup>-7</sup> ]<br>{HZY3299/3306}         | 6.1     |
| <i>rad54Δ mms21-CH</i> | 1.18x10 <sup>-7</sup> (52)<br>[4.27x10 <sup>-8</sup> – 1.15x10 <sup>-6</sup> ]<br>{HZY3271/3272}          | 3.0x10 <sup>-8</sup> (13)<br>[8.71x10 <sup>-9</sup> – 9.26x10 <sup>-8</sup> ]<br>{HZY3300/3301}           | 0.3     |
| <i>rdh54Δ</i>          | 3.72x10 <sup>-9</sup> (1.6)<br>[2.26x10 <sup>-9</sup> – 7.75x10 <sup>-9</sup> ]<br>{HZY3277,JLY382}       | 7.85x10 <sup>-8</sup> (35)<br>[4.36x10 <sup>-8</sup> – 1.27x10 <sup>-7</sup> ]<br>{HZY3274/JLY442}        | 21      |
| <i>rdh54Δ mms21-CH</i> | 5.05x10 <sup>-8</sup> (22)<br>[7.32x10 <sup>-8</sup> – 1.88x10 <sup>-8</sup> ]<br>{HZY3280/3281}          | 4.26x10 <sup>-6</sup> (1877)<br>[2.98x10 <sup>-6</sup> – 6.56x10 <sup>-6</sup> ]<br>{HZY3275/3276,JLY444} | 84      |
| <i>mre11Δ</i> **       | 5.75x10 <sup>-7</sup> (253)<br>[2.82x10 <sup>-7</sup> – 19.2x10 <sup>-7</sup> ]                           | 1.52x10 <sup>-6</sup> (670)<br>[0.95x10 <sup>-6</sup> – 2.77x10 <sup>-6</sup> ]                           | 2.6     |
| <i>mre11Δ mms21-CH</i> | 1.39x10 <sup>-6</sup> (612)<br>[1.13x10 <sup>-6</sup> – 1.58x10 <sup>-6</sup> ]                           | 6.66x10 <sup>-6</sup> (2934)<br>[3.28x10 <sup>-6</sup> – 1.49x10 <sup>-5</sup> ]                          | 4.8     |

|                             | {HZY2480/2481}                                                                                    | {HZY2476/2477/2516}                                                                                  |         |
|-----------------------------|---------------------------------------------------------------------------------------------------|------------------------------------------------------------------------------------------------------|---------|
| Genotype                    | uGCR rate*                                                                                        | dGCR rate*                                                                                           | Ratio # |
| <i>mre11-H125N</i>          | 2.78x10 <sup>-7</sup> (122)<br>[1.80x10 <sup>-7</sup> – 4.01x10 <sup>-7</sup> ]<br>{HZY2771/2772} | 6.23x10 <sup>-7</sup> (274)<br>[5.24x10 <sup>-7</sup> – 9.75x10 <sup>-7</sup> ]<br>{HZY2763/2764}    | 2.2     |
| <i>mre11-H125N mms21-CH</i> | 6.35x10 <sup>-7</sup> (280)<br>[2.73x10 <sup>-7</sup> – 1.43x10 <sup>-6</sup> ]<br>{JLY929/930}   | 4.17x10 <sup>-6</sup> (1837)<br>[2.86x10 <sup>-6</sup> – 5.28x10 <sup>-6</sup> ]<br>{JLY973/974/975} | 6.6     |
| <i>sae2Δ</i> **             | 4.23x10 <sup>-8</sup> (19)<br>[2.92x10 <sup>-8</sup> – 5.32x10 <sup>-8</sup> ]                    | 1.65x10 <sup>-7</sup> (73)<br>[1.09x10 <sup>-7</sup> – 2.09x10 <sup>-7</sup> ]                       | 3.9     |
| <i>sae2Δ mms21-CH</i>       | 6.61x10 <sup>-7</sup> (291)<br>[2.66x10 <sup>-7</sup> – 1.03x10 <sup>-6</sup> ]<br>{HZY2599/2600} | 6.03x10 <sup>-6</sup> (2656)<br>[3.33x10 <sup>-6</sup> – 8.81x10 <sup>-6</sup> ]<br>{HZY2591/2592}   | 9.1     |

\* Rate of accumulating Can 5-FOA progeny. Number in the parenthesis is the fold increase relative to wild-type uGCR strain.

\*\* Rates taken from (Putnam et al., 2009; 2010; Albuquerque et al., 2013).

# The dGCR rate divided by the uGCR rate.

Square brackets represent the upper and lower limits of the 95% confidence intervals of the median.

Strains used to calculate the GCR rate from this study are as indicated in curly braces.
