# Supplementary material for: SUMO E3 ligase Mms21 prevents spontaneous DNA damage induced genome rearrangements
Source: PubMed Central journal article supplement (PMC5860785; doi:10.1371/journal.pgen.1007250), 2018-03-05
Supplement: pgen.1007250.s022.pdf [file pgen.1007250.s022.pdf]

S5 Table. Fluctuation results of double mutants containing a null mutation of genes in the BIR pathway and *mms21-CH* or *sgs1Δ*.

| Genotype                 | uGCR rate*                                                                                         | dGCR rate*                                                                                               | Ratio # |
|--------------------------|----------------------------------------------------------------------------------------------------|----------------------------------------------------------------------------------------------------------|---------|
| Wild type**              | 2.27x10 <sup>-9</sup> (1)                                                                          | 1.97x10 <sup>-8</sup> (8.7)                                                                              | 8.7     |
| <i>mms21-CH</i> **       | 2.08x10 <sup>-8</sup> (9.1)                                                                        | 4.2x10 <sup>-6</sup> (1850)                                                                              | 202     |
| <i>sgs1Δ</i> **          | 1.69x10 <sup>-8</sup> (7.4)                                                                        | 1.93x10 <sup>-6</sup> (850)                                                                              | 114     |
| <i>sgs1Δ mms21-CH</i>    | 1.53x10 <sup>-7</sup> (67)<br>[9.58x10 <sup>-8</sup> – 8.56x10 <sup>-7</sup> ]<br>{HZY2478/2479}   | 2.56x10 <sup>-5</sup> (11278)<br>[1.74x10 <sup>-5</sup> – 3.33x10 <sup>-5</sup> ]<br>{HZY2474/2475/2547} | 167     |
| <i>sgs1Δ rad52Δ</i> **   | 7.75x10 <sup>-8</sup> (34)                                                                         | 8.07x10 <sup>-8</sup> (36)                                                                               | 1.0     |
| <i>sgs1Δ pol32Δ</i>      | 2.05x10 <sup>-8</sup> (9.0)<br>[8.75x10 <sup>-9</sup> – 3.26x10 <sup>-8</sup> ]<br>{JLY1423/1425}  | 3.35x10 <sup>-6</sup> (1476)<br>[2.16x10 <sup>-6</sup> – 4.11x10 <sup>-6</sup> ]<br>{JLY1427/1428}       | 163     |
| <i>sgs1Δ mre11-H125N</i> | 8.07x10 <sup>-7</sup> (355)<br>[7.46x10 <sup>-7</sup> – 2.97x10 <sup>-6</sup> ]<br>{JLY1489/1491}  | 1.25x10 <sup>-5</sup> (5507)<br>[7.31x10 <sup>-6</sup> – 2.36x10 <sup>-5</sup> ]<br>{JLY1490/1493}       | 15      |
| <i>sgs1-3KR</i>          | 2.10x10 <sup>-9</sup> (0.9)<br>[5.50x10 <sup>-10</sup> – 3.64x10 <sup>-8</sup> ]<br>{JLY1534/1535} | 9.68x10 <sup>-8</sup> (43)<br>[7.03x10 <sup>-8</sup> – 3.54x10 <sup>-7</sup> ]<br>{JLY1537/1538}         | 46      |
| <i>sgs1-E12G,H13C</i>    | 6.51x10 <sup>-8</sup> (29)<br>[4.12x10 <sup>-8</sup> – 1.05x10 <sup>-7</sup> ]<br>{JLY1569}        | 4.25x10 <sup>-6</sup> (1872)<br>[3.29x10 <sup>-6</sup> – 6.89x10 <sup>-6</sup> ]<br>{JLY1572/1573}       | 65      |
| <i>sgs1-K706A</i>        | 2.16x10 <sup>-8</sup> (9.5)<br>[8.91x10 <sup>-9</sup> – 3.86x10 <sup>-8</sup> ]<br>{JLY1570/1571}  | 2.49x10 <sup>-6</sup> (1097)<br>[2.17x10 <sup>-6</sup> – 3.32x10 <sup>-6</sup> ]<br>{JLY1574/1576}       | 115     |
| <i>exo1Δ</i>             | 1.01x10 <sup>-8</sup> (4.4)<br>[5.13x10 <sup>-9</sup> – 2.00x10 <sup>-8</sup> ]<br>{HZY2922/3036}  | 8.44x10 <sup>-8</sup> (37)**                                                                             | 8.4     |
| <i>exo1Δ mms21-CH</i>    | 1.29x10 <sup>-7</sup> (57)<br>[8.21x10 <sup>-8</sup> – 1.67x10 <sup>-7</sup> ]<br>{HZY3196/3197}   | 4.39x10 <sup>-6</sup> (1934)<br>[2.65x10 <sup>-6</sup> – 1.02x10 <sup>-5</sup> ]<br>{HZY3190}            | 34      |
| <i>pol32Δ</i> **         | 3.41x10 <sup>-9</sup> (1.5)                                                                        | 3.15x10 <sup>-8</sup> (14)                                                                               | 9.2     |
| <i>pol32Δ mms21-CH</i>   | 3.64x10 <sup>-8</sup> (16)<br>[1.24x10 <sup>-8</sup> – 1.52x10 <sup>-7</sup> ]<br>{JLY726/727}     | 2.75x10 <sup>-7</sup> (121)<br>[1.11x10 <sup>-7</sup> – 6.82x10 <sup>-7</sup> ]<br>{JLY768/769}          | 7.6     |
| <i>srs2Δ</i>             | 9.01x10 <sup>-9</sup> (4.0)<br>[5.83x10 <sup>-9</sup> – 7.17x10 <sup>-8</sup> ]<br>{JLY1316}       | 1.28x10 <sup>-7</sup> (56)**                                                                             | 14.2    |
| <i>srs2Δ mms21-CH</i>    | 2.03x10 <sup>-7</sup> (89)<br>[1.25x10 <sup>-7</sup> – 2.90x10 <sup>-7</sup> ]                     | 3.41x10 <sup>-6</sup> (1502)<br>[2.59x10 <sup>-6</sup> – 4.26x10 <sup>-6</sup> ]                         | 17      |

|                       |                                                                                                   |                                                                                                    |         |
|-----------------------|---------------------------------------------------------------------------------------------------|----------------------------------------------------------------------------------------------------|---------|
|                       | {HZY3286/3287}                                                                                    | {HZY3328/3329}                                                                                     |         |
| <i>pif1Δ</i> **       | 3.73x10 <sup>-7</sup> (164)                                                                       | 3.61x10 <sup>-7</sup> (159)                                                                        | 1.0     |
| <i>pif1Δ mms21-CH</i> | 4.91x10 <sup>-6</sup> (2163)<br>[4.04x10 <sup>-6</sup> – 7.68x10 <sup>-6</sup> ]<br>{JLY723/724}  | 1.21x10 <sup>-5</sup> (5330)<br>[5.56x10 <sup>-6</sup> – 1.93x10 <sup>-5</sup> ]<br>{JLY667/668}   | 2.5     |
| <i>rrm3Δ</i>          | 1.46x10 <sup>-8</sup> (6.4)<br>[3.33x10 <sup>-9</sup> – 2.00x10 <sup>-7</sup> ]<br>{JLY737}       | 3.87x10 <sup>-8</sup> (17)**                                                                       | 2.7     |
| Genotype              | uGCR rate*                                                                                        | dGCR rate*                                                                                         | Ratio # |
| <i>rrm3Δ mms21-CH</i> | 2.37x10 <sup>-8</sup> (10)<br>[4.91x10 <sup>-9</sup> – 8.68x10 <sup>-8</sup> ]<br>{JLY773/779}    | 9.74x10 <sup>-8</sup> (43)<br>[5.77x10 <sup>-8</sup> – 2.28x10 <sup>-7</sup> ]<br>{JLY671/672/777} | 4.1     |
| <i>mph1Δ</i> **       | 2.00x10 <sup>-9</sup> (0.9)                                                                       | 1.05x10 <sup>-7</sup> (46)                                                                         | 53      |
| <i>mph1Δ mms21-CH</i> | 3.50x10 <sup>-7</sup> (154)<br>[1.47x10 <sup>-7</sup> – 6.72x10 <sup>-7</sup> ]<br>{JLY1452/1453} | 8.21x10 <sup>-6</sup> (3617)<br>[2.52x10 <sup>-6</sup> – 9.99x10 <sup>-6</sup> ]<br>{JLY1456/1457} | 23      |
| <i>csm2Δ</i>          | 1.12x10 <sup>-8</sup> (4.9)<br>[5.30x10 <sup>-9</sup> – 1.96x10 <sup>-8</sup> ]<br>{JLY469/470}   | 7.19x10 <sup>-8</sup> (32)<br>[4.94x10 <sup>-8</sup> – 8.71x10 <sup>-8</sup> ]<br>{JLY483/484}     | 6.4     |
| <i>csm2Δ mms21-CH</i> | 2.85x10 <sup>-7</sup> (126)<br>[5.36x10 <sup>-7</sup> – 2.08x10 <sup>-7</sup> ]<br>{JLY485}       | 2.38x10 <sup>-6</sup> (1048)<br>[1.86x10 <sup>-6</sup> – 3.05x10 <sup>-6</sup> ]<br>{JLY467/468}   | 8.4     |

\* Rate of accumulating Can 5-FOA progeny. Number in the parenthesis is the fold increase relative to wild-type uGCR strain.

\*\* Rates taken from (Putnam et al., 2009; 2010; Albuquerque et al., 2013).

# The dGCR rate divided by the uGCR rate.

[ ] represent the upper and lower limits of the 95% confidence intervals of the median.

Strains used to calculate the GCR rate from this study are as indicated using { }.
