# Supplementary material for: SUMO E3 ligase Mms21 prevents spontaneous DNA damage induced genome rearrangements
Source: PubMed Central journal article supplement (PMC5860785; doi:10.1371/journal.pgen.1007250), 2018-03-05
Supplement: pgen.1007250.s023.pdf [file pgen.1007250.s023.pdf]

S6 Table. Fluctuation results of double mutants containing a null mutation of genes in the DNA damage checkpoint pathways and *mms21-CH*.

| Genotype                     | uGCR rate*                                                                                        | dGCR rate*                                                                                         | Ratio # |
|------------------------------|---------------------------------------------------------------------------------------------------|----------------------------------------------------------------------------------------------------|---------|
| Wild type**                  | 2.27x10 <sup>-9</sup> (1)<br>[1.30x10 <sup>-9</sup> – 4.78x10 <sup>-9</sup> ]                     | 1.97x10 <sup>-8</sup> (8.7)<br>[1.61x10 <sup>-8</sup> – 4.32x10 <sup>-8</sup> ]                    | 8.7     |
| <i>mms21-CH</i> **           | 2.08x10 <sup>-8</sup> (9.1)<br>[0.00x10 <sup>-8</sup> – 18.2x10 <sup>-8</sup> ]                   | 4.2x10 <sup>-6</sup> (1850)<br>[2.4x10 <sup>-6</sup> – 22.2x10 <sup>-6</sup> ]                     | 202     |
| <i>mec1Δ sml1Δ</i> **        | 2.34x10 <sup>-8</sup> (10)<br>[1.29x10 <sup>-8</sup> – 4.02x10 <sup>-8</sup> ]                    | 1.50x10 <sup>-7</sup> (66)<br>[0.55x10 <sup>-7</sup> – 2.74x10 <sup>-7</sup> ]                     | 6.4     |
| <i>mec1Δ sml1Δ mms21-CH</i>  | 3.87x10 <sup>-7</sup> (170)<br>[8.45x10 <sup>-8</sup> – 7.34x10 <sup>-7</sup> ]<br>{HZY2927/2928} | 7.81x10 <sup>-7</sup> (344)<br>[2.20x10 <sup>-7</sup> – 2.74x10 <sup>-6</sup> ]<br>{HZY2836/2837}  | 2.0     |
| <i>tel1Δ</i> **              | 4.99x10 <sup>-9</sup> (2.2)<br>[0.0x10 <sup>-9</sup> – 9.20x10 <sup>-9</sup> ]                    | 2.87x10 <sup>-8</sup> (13)<br>[1.81x10 <sup>-8</sup> – 5.68x10 <sup>-8</sup> ]                     | 5.8     |
| <i>tel1Δ mms21-CH</i>        | 1.41x10 <sup>-8</sup> (6.2)<br>[8.04x10 <sup>-9</sup> – 5.72x10 <sup>-8</sup> ]<br>{HZY3145}      | 3.80x10 <sup>-6</sup> (1674)<br>[2.66x10 <sup>-6</sup> – 7.67x10 <sup>-6</sup> ]<br>{HZY2974/2975} | 270     |
| <i>rad9Δ</i> **              | 2.17x10 <sup>-8</sup> (9.6)<br>[0.98x10 <sup>-8</sup> – 4.81x10 <sup>-8</sup> ]                   | 3.82x10 <sup>-8</sup> (17)<br>[0.0x10 <sup>-8</sup> – 9.93x10 <sup>-8</sup> ]                      | 1.8     |
| <i>rad9Δ mms21-CH</i>        | 1.14x10 <sup>-7</sup> (50)<br>[2.39x10 <sup>-8</sup> – 3.38x10 <sup>-7</sup> ]<br>{HZY3082/3083}  | 1.74x10 <sup>-7</sup> (77)<br>[1.40x10 <sup>-7</sup> – 2.86x10 <sup>-7</sup> ]<br>{HZY2940/2941}   | 1.5     |
| <i>mrc1Δ</i> **              | 3.35x10 <sup>-9</sup> (1.5)<br>[0.0x10 <sup>-9</sup> – 16.4x10 <sup>-9</sup> ]                    | 3.75x10 <sup>-7</sup> (165)<br>[2.79x10 <sup>-7</sup> – 5.16x10 <sup>-7</sup> ]                    | 112     |
| <i>mrc1Δ mms21-CH</i>        | 9.50x10 <sup>-7</sup> (419)<br>[6.05x10 <sup>-8</sup> – 1.75x10 <sup>-6</sup> ]<br>{HZY3112/3113} | 7.30x10 <sup>-6</sup> (3216)<br>[4.66x10 <sup>-6</sup> – 1.03x10 <sup>-5</sup> ]<br>{HZY2964/2965} | 7.7     |
| <i>mrc1-aq</i> **            | 1.51x10 <sup>-9</sup> (0.7)<br>[0.0x10 <sup>-9</sup> – 5.19x10 <sup>-9</sup> ]                    | 1.23x10 <sup>-7</sup> (54)<br>[0.64x10 <sup>-7</sup> – 5.29x10 <sup>-7</sup> ]                     | 81      |
| <i>mrc1-aq mms21-CH</i>      | 1.06x10 <sup>-7</sup> (47)<br>[7.52x10 <sup>-8</sup> – 1.89x10 <sup>-7</sup> ]<br>{JLY1460/1461}  | 4.60x10 <sup>-6</sup> (2026)<br>[3.18x10 <sup>-6</sup> – 7.06x10 <sup>-6</sup> ]<br>{JLY1464/1465} | 43      |
| <i>rad53Δ sml1Δ</i> **       | 5.60x10 <sup>-8</sup> (25)<br>[2.53x10 <sup>-8</sup> – 11.0x10 <sup>-8</sup> ]                    | 3.05x10 <sup>-7</sup> (134)<br>[1.16x10 <sup>-7</sup> – 7.31x10 <sup>-7</sup> ]                    | 5.4     |
| <i>rad53Δ sml1Δ mms21-CH</i> | 7.19x10 <sup>-8</sup> (32)<br>[2.89x10 <sup>-8</sup> – 9.05x10 <sup>-8</sup> ]<br>{HZY3008}       | 5.48x10 <sup>-7</sup> (241)<br>[2.73x10 <sup>-7</sup> – 9.80x10 <sup>-7</sup> ]<br>{HZY2805/3236}  | 7.6     |
| <i>chk1Δ</i> **              | 1.76x10 <sup>-8</sup> (7.8)<br>[7.5x10 <sup>-10</sup> – 6.02x10 <sup>-8</sup> ]                   | 1.96x10 <sup>-7</sup> (86)<br>[0.86x10 <sup>-7</sup> – 4.37x10 <sup>-7</sup> ]                     | 11      |
| <i>chk1Δ mms21-CH</i>        | 6.75x10 <sup>-8</sup> (30)<br>[3.99x10 <sup>-6</sup> – 9.75x10 <sup>-6</sup> ]<br>{HZY3158}       | 4.02x10 <sup>-6</sup> (1771)<br>[3.02x10 <sup>-6</sup> – 5.93x10 <sup>-6</sup> ]<br>{HZY2987/2988} | 60      |

| Genotype               | uGCR rate*                                                                                        | dGCR rate*                                                                                         | Ratio # |
|------------------------|---------------------------------------------------------------------------------------------------|----------------------------------------------------------------------------------------------------|---------|
| <i>dun1Δ</i>           | 1.26x10 <sup>-8</sup> (5.6)<br>[7.70x10 <sup>-9</sup> – 2.25x10 <sup>-8</sup> ]<br>{HZY2876/2877} | 5.52x10 <sup>-7</sup> (243)<br>[4.13x10 <sup>-7</sup> – 1.04x10 <sup>-6</sup> ]<br>{HZY2864/2865}  | 44      |
| <i>dun1Δ mms21-CH</i>  | 5.96x10 <sup>-7</sup> (263)<br>[4.91x10 <sup>-8</sup> – 6.01x10 <sup>-6</sup> ]<br>{HZY3154}      | 3.39x10 <sup>-6</sup> (1493)<br>[2.51x10 <sup>-6</sup> – 5.76x10 <sup>-6</sup> ]<br>{HZY2839/2995} | 5.7     |
| <i>mec3Δ</i>           | 1.02x10 <sup>-8</sup> (4.5)<br>[2.56x10 <sup>-9</sup> – 6.33x10 <sup>-8</sup> ]<br>{HZY3088}      | 3.77x10 <sup>-7</sup> (166)<br>[2.29x10 <sup>-7</sup> – 7.37x10 <sup>-7</sup> ]<br>{HZY2632/2633}  | 37      |
| <i>mec3Δ mms21-CH</i>  | 1.01x10 <sup>-7</sup> (44)<br>[4.74x10 <sup>-8</sup> – 2.14x10 <sup>-7</sup> ]<br>{HZY3092}       | 6.15x10 <sup>-7</sup> (271)<br>[4.13x10 <sup>-7</sup> – 8.78x10 <sup>-7</sup> ]<br>{HZY2634/2635}  | 6.1     |
| <i>rad24Δ**</i>        | 2.00x10 <sup>-8</sup> (8.8)<br>[0.99x10 <sup>-8</sup> – 3.06x10 <sup>-8</sup> ]                   | 1.97x10 <sup>-7</sup> (87)<br>[1.43x10 <sup>-7</sup> – 2.52x10 <sup>-7</sup> ]                     | 9.9     |
| <i>rad24Δ mms21-CH</i> | 1.68x10 <sup>-7</sup> (74)<br>[5.41x10 <sup>-8</sup> – 5.29x10 <sup>-7</sup> ]<br>{HZY3103/3104}  | 1.84x10 <sup>-6</sup> (811)<br>[9.73x10 <sup>-7</sup> – 3.87x10 <sup>-6</sup> ]<br>{HZY2698/2699}  | 11      |

\* Rate of accumulating Can 5-FOA progeny. Number in the parenthesis is the fold increase relative to wild-type uGCR strain.

\*\* Rates taken from (Putnam et al., 2009; 2010; Albuquerque et al., 2013).

# The dGCR rate divided by the uGCR rate.

Square brackets represent the upper and lower limits of the 95% confidence intervals of the median.

Strains used to calculate the GCR rate from this study are as indicated using curly braces.
